# Supplementary material for: Antimicrobial discontinuation in dogs with acute aspiration pneumonia based on clinical improvement and normalization of C‐reactive protein concentration
Source: PubMed Central journal article supplement — J Vet Intern Med. 2022 Mar 29;36(3):1082–8. doi: 10.1111/jvim.16405 (PMC9151469; doi:10.1111/jvim.16405), 2022-03-29
Supplement: JVIM-36-1082-s001.pdf [file JVIM-36-1082-s001.pdf]

## Addendum 1: Quality of life questionnaire

The purpose of this questionnaire is to quantify the impact of the respiratory pathology from which your animal suffers on its quality of life. To correctly answer this questionnaire, you are asked to answer each question by remembering the clinical condition of your dog in the past 2 days.

For each question, we ask you to grade your answer on a scale from 0 to 4.

(Concerning the cough)

- |                   |                                |
|-------------------|--------------------------------|
| 0 = Not at all    | (no cough)                     |
| 1 = Exceptionally | (1x/day)                       |
| 2 = Rarely        | (1-5 x/day)                    |
| 3 = Frequently    | (> 5 x/day but not every hour) |
| 4 = Continuously  | (several times per hour)       |

Date: .....

Name of the dog: .....

File number : .....

Owner's name: .....

| <b>Questions</b>                                                           | <b>Answer</b> |   |   |   |            |
|----------------------------------------------------------------------------|---------------|---|---|---|------------|
|                                                                            | 0             | 1 | 2 | 3 | 4          |
| 1. Does your dog cough ?                                                   | 0             | 0 | 0 | 0 | 0          |
| 2. Is this cough worsened by exercise, excitement or stress?               | 0             | 0 | 0 | 0 | 0          |
| 3. Does this cough have an impact on your dog's activity and / or comfort? | 0             | 0 | 0 | 0 | 0          |
| 4. Is your dog intolerant to exercise?                                     | 0             | 0 | 0 | 0 | 0          |
| 5. Does he have difficulty breathing at rest?                              | 0             | 0 | 0 | 0 | 0          |
| 6. Is your dog more tired or lethargic?                                    | 0             | 0 | 0 | 0 | 0          |
| 7. Does your dog have episodes of cyanosis / syncope?                      | 0             | 0 | 0 | 0 | 0          |
| 8. Is your dog's appetite low?                                             | 0             | 0 | 0 | 0 | 0          |
| 9. Is your dog nauseated or vomiting?                                      | 0             | 0 | 0 | 0 | 0          |
| <b>TOTAL</b>                                                               |               |   |   |   | <b>/36</b> |
